# Supplementary material for: Identifying relationships between imaging phenotypes and lung cancer-related mutation status: EGFR and KRAS
Source: PubMed Central journal article supplement (PMC7046701; doi:10.1038/s41598-020-60202-3), 2020-02-27
Supplement: 41598_2020_60202_MOESM1_ESM.pdf [file 41598_2020_60202_MOESM1_ESM.pdf]

|                          | Radiomics       |                 | Semantic        |                 |
|--------------------------|-----------------|-----------------|-----------------|-----------------|
|                          | EGFR (%)        | KRAS (%)        | EGFR (%)        | KRAS (%)        |
| Number of Patients       | 116             | 114             | 158             | 157             |
| <b>Clinical Features</b> | <b>EGFR (%)</b> | <b>KRAS (%)</b> | <b>EGFR (%)</b> | <b>KRAS (%)</b> |
| <b>Gender</b>            |                 |                 |                 |                 |
| Female                   | 24.1            | 23.7            | 36.1            | 35.0            |
| Male                     | 75.9            | 76.3            | 63.9            | 80.3            |
| <b>Smoking Status</b>    |                 |                 |                 |                 |
| Non-smoker               | 13.8            | 14.0            | 22.8            | 24.2            |
| Current                  | 19.8            | 20.2            | 15.2            | 14.6            |
| Former                   | 66.4            | 65.8            | 62.0            | 61.1            |

**Table 1.** Distribution of the clinical data used for EGFR and KRAS mutation status prediction experiments.

| Semantic Features                       | Nodule/Non-nodule | EGFR (%) | KRAS (%) |
|-----------------------------------------|-------------------|----------|----------|
| <b>Axial Location</b>                   | Non-nodule        |          |          |
| Central                                 |                   | 21.7     | 20.9     |
| Peripheral                              |                   | 78.3     | 79.1     |
| <b>Nodule Attenuation</b>               | Nodule            |          |          |
| Solid                                   |                   | 56.1     | 57.6     |
| Partially solid                         |                   | 40.8     | 39.2     |
| Ground glass                            |                   | 3.2      | 3.2      |
| <b>Nodule Margins Dominant Pattern</b>  | Nodule            |          |          |
| Irregular                               |                   | 17.2     | 15.2     |
| Lobulated                               |                   | 30.6     | 32.2     |
| Spiculated                              |                   | 25.5     | 26.6     |
| Poorly defined                          |                   | 16.6     | 15.8     |
| Smooth                                  |                   | 10.2     | 10.1     |
| <b>Nodule Margins Secondary Pattern</b> | Nodule            |          |          |
| Irregular                               |                   | 37.6     | 39.9     |
| Lobulated                               |                   | 31.2     | 31.0     |
| Spiculated                              |                   | 3.8      | 3.2      |
| Poorly defined                          |                   | 16.6     | 15.2     |
| Smooth                                  |                   | 10.8     | 10.8     |
| <b>Nodule Associated Findings</b>       | Nodule            |          |          |
| Pleural retraction                      |                   | 10.2     | 10.1     |
| Vascular convergence                    |                   | 20.4     | 20.3     |
| Septal thickening                       |                   | 18.5     | 21.5     |
| None                                    |                   | 9.6      | 8.9      |
| Attachment to pleura                    |                   | 7.6      | 7.6      |
| Entering airway                         |                   | 21.7     | 20.3     |
| Attachement to vessel                   |                   | 9.6      | 8.9      |
| Bronchovascular bundle                  |                   | 2.5      | 2.5      |
| <b>Centrilobular Nodules - Diffuse</b>  | Non-nodule        |          |          |
| Absent                                  |                   | 87.3     | 88.6     |
| Present                                 |                   | 12.7     | 11.4     |
| <b>Nodule shape</b>                     | Nodule            |          |          |
| Complex                                 |                   | 58.0     | 57.0     |
| Round                                   |                   | 29.3     | 29.7     |
| Oval                                    |                   | 12.1     | 12.7     |
| Polygonal                               |                   | 0.6      | 0.6      |
| <b>Nodule calcification</b>             | Nodule            |          |          |
| Peripheral                              |                   | 6.4      | 7.0      |
| None                                    |                   | 93.6     | 93.0     |

| <b>Semantic Features</b>                                                | <b>Nodule/Non-nodule</b> | <b>EGFR (%)</b> | <b>KRAS (%)</b> |
|-------------------------------------------------------------------------|--------------------------|-----------------|-----------------|
| <b>Satellite Nodules in Dominant Lesion Lobe (&gt;4mm noncalcified)</b> | Non-nodule               |                 |                 |
| Absent                                                                  |                          | 77.1            | 75.9            |
| Solid                                                                   |                          | 7.6             | 8.2             |
| Partially-solid                                                         |                          | 5.1             | 5.1             |
| Non-solid                                                               |                          | 10.2            | 10.8            |
| <b>Nodules in Non-Lesion Lobe Same Lung (&gt;4mm noncalcified)</b>      | Non-nodule               |                 |                 |
| Absent                                                                  |                          | 82.8            | 81.6            |
| Solid                                                                   |                          | 5.7             | 6.3             |
| Partially-solid                                                         |                          | 1.9             | 2.5             |
| Non-solid                                                               |                          | 9.6             | 9.5             |
| <b>Nodules in Contralateral Lung (&gt;4mm noncalcified)</b>             | Non-nodule               |                 |                 |
| Absent                                                                  |                          | 76.4            | 75.3            |
| Solid                                                                   |                          | 5.1             | 5.7             |
| Partially-solid                                                         |                          | 7.6             | 7.6             |
| Non-solid                                                               |                          | 10.8            | 11.4            |
| <b>Nodule Internal Features</b>                                         | Nodule                   |                 |                 |
| Not applicable                                                          |                          | 50.3            | 51.3            |
| Cavitated                                                               |                          | 8.9             | 8.2             |
| Internal air bronchogram sign                                           |                          | 28.0            | 27.8            |
| Reticulation                                                            |                          | 7.0             | 7.0             |
| Necrosis                                                                |                          | 3.2             | 3.2             |
| Nodule cysts                                                            |                          | 2.5             | 2.5             |
| <b>Nodule Periphery</b>                                                 | Nodule                   |                 |                 |
| Emphysema                                                               |                          | 26.1            | 26.6            |
| Normal                                                                  |                          | 70.1            | 69.6            |
| Fibrosis                                                                |                          | 3.8             | 3.8             |
| <b>Emphysema</b>                                                        | Non-nodule               |                 |                 |
| absent                                                                  |                          | 47.8            | 48.7            |
| present                                                                 |                          | 52.2            | 51.3            |
| <b>Fibrosis</b>                                                         | Non-nodule               |                 |                 |
| absent                                                                  |                          | 89.8            | 88.6            |
| present                                                                 |                          | 10.2            | 11.4            |
| <b>Lung Parenchyma Features</b>                                         | Non-nodule               |                 |                 |
| Bronchial wall thickening                                               |                          | 33.8            | 32.9            |
| Tree-in-bud sign                                                        |                          | 1.9             | 2.5             |
| Airway ectasia                                                          |                          | 9.6             | 9.5             |
| Mosaic oligemia                                                         |                          | 5.1             | 5.1             |
| Bronchial prominence                                                    |                          | 0.6             | 1.3             |
| Bronchiectasis                                                          |                          | 3.8             | 4.4             |
| Normal                                                                  |                          | 45.2            | 44.3            |
| <b>Dominant Emphysema Pattern</b>                                       | Non-nodule               |                 |                 |
| Paraseptal                                                              |                          | 12.7            | 12.0            |
| Centrilobular                                                           |                          | 37.6            | 38.0            |
| Panacinar                                                               |                          | 1.9             | 1.3             |
| Not applicable                                                          |                          | 47.8            | 48.7            |
| <b>Secondary Emphysema Pattern</b>                                      | Non-nodule               |                 |                 |
| Paraseptal                                                              |                          | 17.2            | 17.1            |
| Centrilobular                                                           |                          | 8.3             | 7.6             |
| Panacinar                                                               |                          | 0.6             | 0.6             |
| Not applicable                                                          |                          | 73.9            | 74.7            |

**Table 2.** Distribution of the semantic data used for EGFR and KRAS mutation status prediction experiments.

| Semantic Feature                                                                           | Score             |
|--------------------------------------------------------------------------------------------|-------------------|
| Emphysema: Present                                                                         | 0.2076 +/- 0.0648 |
| Nodule Periphery: Normal                                                                   | 0.1492 +/- 0.1027 |
| Lung Parenchyma Features: Normal                                                           | 0.1159 +/- 0.0498 |
| Nodule Attenuation: Solid                                                                  | 0.0480 +/- 0.0287 |
| Nodule Attenuation: Partial solid                                                          | 0.0470 +/- 0.0191 |
| Smoking status: Nonsmoker                                                                  | 0.0425 +/- 0.0181 |
| Nodule Internal Features: Internal air bronchogram sign                                    | 0.0423 +/- 0.0241 |
| Gender: Male                                                                               | 0.0421 +/- 0.0167 |
| Nodule Shape: Round                                                                        | 0.0392 +/- 0.0199 |
| Axial Location: Peripheral                                                                 | 0.0333 +/- 0.0329 |
| Nodule Margins-Secondary Pattern: Lobulated                                                | 0.0294 +/- 0.0238 |
| Nodule Margins-Dominant Pattern: Lobulated                                                 | 0.0275 +/- 0.0230 |
| Nodule Associated Findings: Septal thickening                                              | 0.0275 +/- 0.0169 |
| Smoking status: Former                                                                     | 0.0262 +/- 0.0114 |
| Nodule Margins-Dominant Pattern: Poorly defined                                            | 0.0274 +/- 0.0238 |
| Nodule Margins-Dominant Pattern: Spiculated                                                | 0.0202 +/- 0.0173 |
| Nodule Associated Findings: Entering airway                                                | 0.0187 +/- 0.0194 |
| Nodule Margins-Secondary Pattern: Poorly defined                                           | 0.0104 +/- 0.0215 |
| Nodule Associated Findings: Vascular convergence                                           | 0.0085 +/- 0.0135 |
| Centrilobular Nodules: Diffuse                                                             | 0.0069 +/- 0.0195 |
| Fibrosis: Present - Diffuse                                                                | 0.0069 +/- 0.0155 |
| Nodule Margins-Dominant Pattern: Smooth                                                    | 0.0060 +/- 0.0248 |
| Dominant Emphysema Pattern: Paraseptal                                                     | 0.0054 +/- 0.0200 |
| Satellite Nodules in Dominant Lesion Lobe (greater than 4mm noncalcified): Non-solid       | 0.0028 +/- 0.0086 |
| Nodules in Contralateral Lung (greater than 4mm noncalcified): Non-solid                   | 0.0026 +/- 0.0082 |
| Nodules in Non-Lesion Lobe Same Lung (greater than 4mm noncalcified): Non-solid            | 0.0025 +/- 0.0074 |
| Secondary Emphysema Pattern: Paraseptal                                                    | 0.0019 +/- 0.0000 |
| Nodule Margins-Secondary Pattern: Smooth                                                   | 0.0010 +/- 0.0049 |
| Nodule Shape: Oval                                                                         | 0.0010 +/- 0.0046 |
| Nodule Associated Findings: Attachment to vessel                                           | 0.0010 +/- 0.0055 |
| Nodule Calcification: Peripheral                                                           | 0.0008 +/- 0.0063 |
| Nodule Associated Findings: Pleural retraction                                             | 0.0007 +/- 0.0034 |
| Nodules in Non-Lesion Lobe Same Lung (greater than 4mm noncalcified): Solid                | 0.0005 +/- 0.0032 |
| Nodule Associated Findings: None                                                           | 0.0002 +/- 0.0020 |
| Satellite Nodules in Dominant Lesion Lobe (greater than 4mm noncalcified): Partially solid | 0.0002 +/- 0.0018 |
| Nodules in Contralateral Lung (greater than 4mm noncalcified): Solid                       | 0.0002 +/- 0.0018 |
| Nodule Internal Features: Reticulation                                                     | 0.0002 +/- 0.0020 |

**Table 3.** Semantic features importance scores.

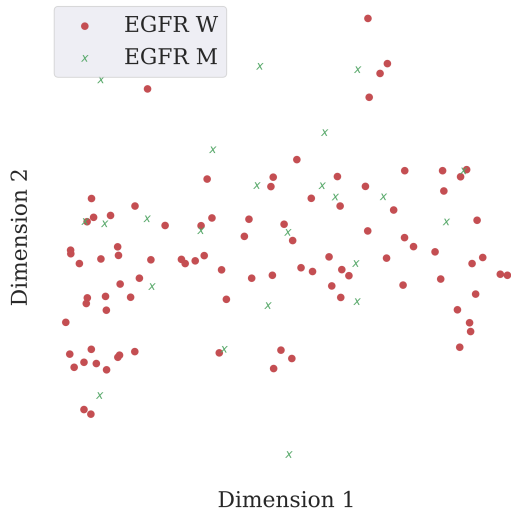

(a) EGFR t-SNE using radiomic features.

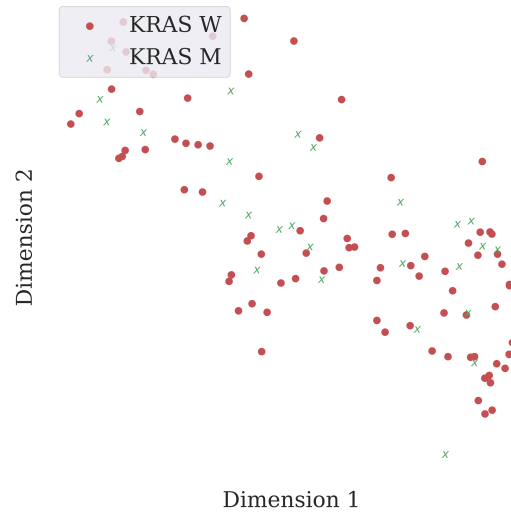

(b) KRAS t-SNE using radiomic features.

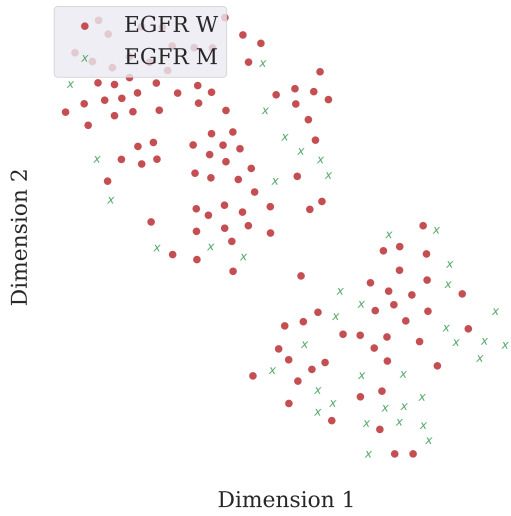

(c) EGFR t-SNE using semantic nodule features.

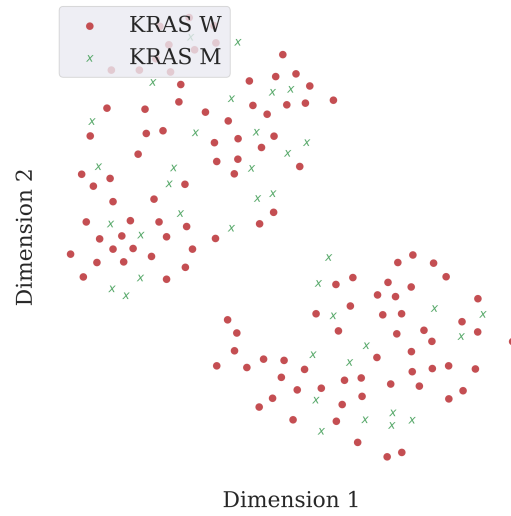

(d) KRAS t-SNE using semantic nodule features.

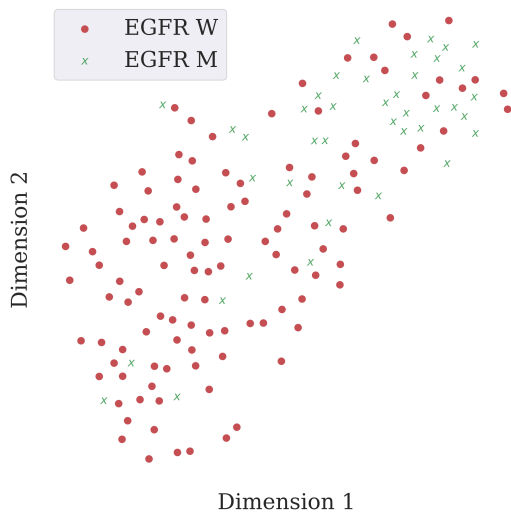

(e) EGFR t-SNE using semantic non-nodule features.

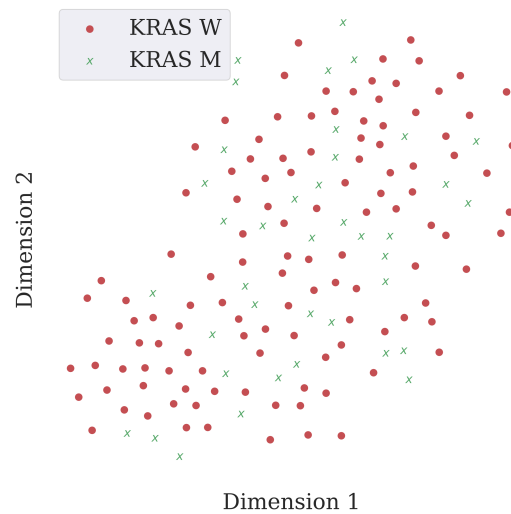

(f) KRAS t-SNE using semantic non-nodule features.

**Figure 1.** Visualisation of sample distributions based on PCA and t-SNE. Each point is coloured according to its mutation status, with red and green dots representing wild type and mutated cases, respectively. 4/4
